# Supplementary figures and images for: MDM2 Inhibition Sensitizes Prostate Cancer Cells to Androgen Ablation and Radiotherapy in a p53-Dependent Manner
Source: PubMed Central journal article supplement — Neoplasia. 2016 Apr 20;18(4):213–22. doi: 10.1016/j.neo.2016.01.006 (PMC4840291; doi:10.1016/j.neo.2016.01.006), 2016-04-20

## Supplementary figure 1

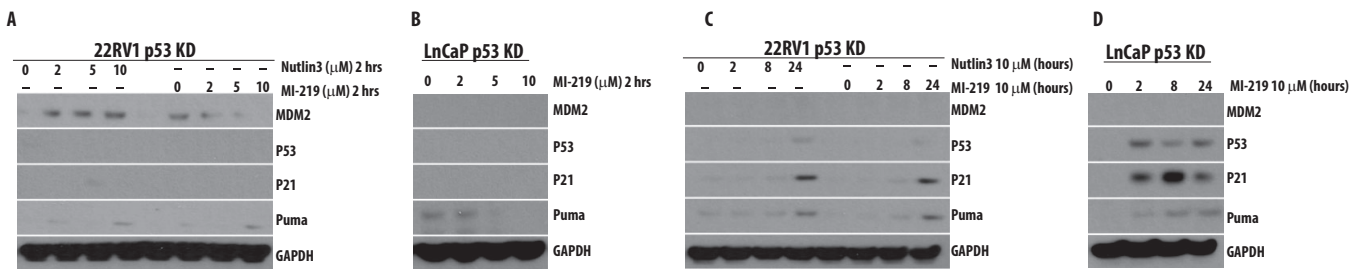

## Supplementary figure 2

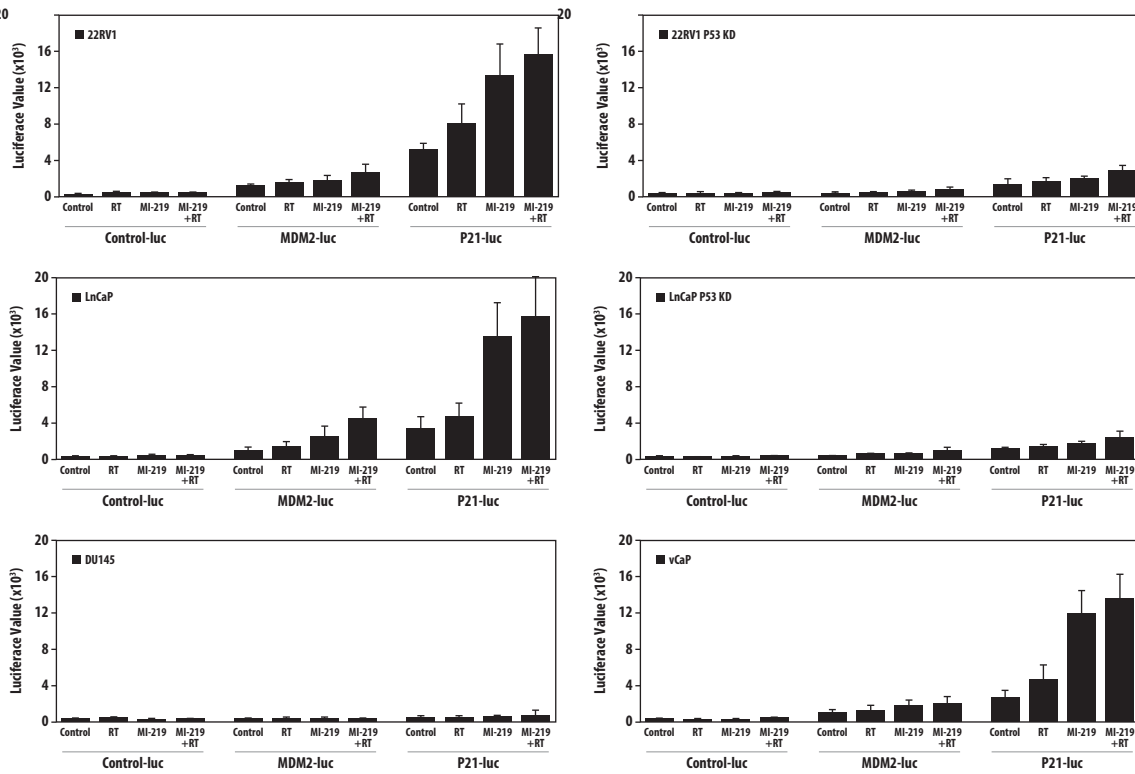

## Supplementary figure 3

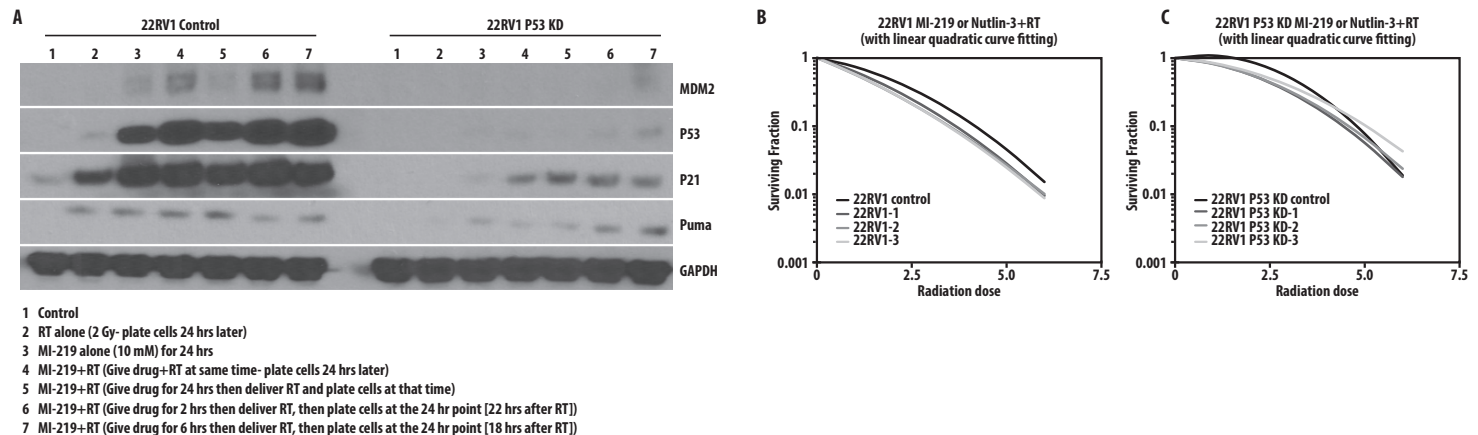

## Supplementary figure 4

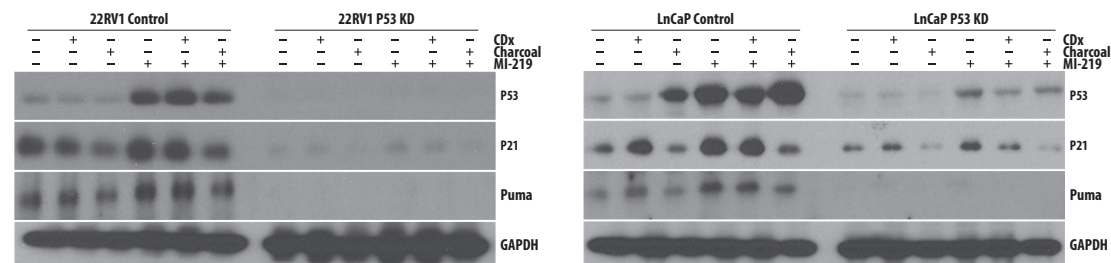

Supplement: mmc2.pdf [file mmc2.pdf]
